# Supplementary material for: Single-Cell Transcriptomic Analysis Reveals Two Molecularly and Clinically Distinct Subtypes of Intrahepatic Cholangiocarcinoma
Source: Research Square preprint supplement (doi:10.21203/rs.3.rs-641386/v1), 2021-06-25
Supplement: Supplementary file 6 [file b7c354f0a0880bfd0fc92653.xlsx]

## Sheet: Sheet1
Supplementary Data 8. Anti-human antibodies used in flow cytometry, immunohistochemistry, and Multi-spectral immunohistochemistry.
Antibody	Catalogue	Company
DRAQ5		CST
DAPI		Biolegend
S100P	ab133554	Abcam
SPP1	ab214050	Abcam
CCL18	ab104867	Abcam
CD68	76437	CST
CD206	91992	CST
CREB3L1	11235-2-AP	Proteintech
CK19	ab5262	Abcam
ID3	A5375	ABclonal
PDGFRβ	ab32570	Abcam
Hepar-1	ab190706	Abcam
EPCAM	ab223582	Abcam
PSCA	sc-80654	Santa Cruz Biotechnology
CD3	ab16669	Abcam
CD45	ab40763	Abcam
CD20	ab78237	Abcam
CD56	ab220360	Abcam
