# Supplementary material for: Single-Cell Transcriptomic Analysis Reveals Two Molecularly and Clinically Distinct Subtypes of Intrahepatic Cholangiocarcinoma
Source: Research Square preprint supplement (doi:10.21203/rs.3.rs-641386/v1), 2021-06-25
Supplement: Supplementary file 8 [file c2cda96a41ce790a70e111d1.xlsx]

## Sheet: Description
Supplementary Data 3 Clinicopathologic correlation and survival analysis of ICC patients with S100P+SPP1- and S100P-SPP1+ from TMA cohort..
1. Clinicopathologic relation. Clinicopathological characteristics of ICC patients with S100P+SPP1- and S100P-SPP1+
2. Survial analysis. Univariable and multivariable analyses of factors associated with survival in S100P+SPP1- and S100P-SPP1+ patients.

## Sheet: 1.Clinicopathologic relation
Characteristics	Total	S100P+SPP1-	S100P-SPP1+	P-value
Age
≤ 51	28 (15.1 %)	9 (13.2 %)	19 (16.1 %)	0.599
> 51	158 (84.9 %)	59 (86.8 %)	99 (83.9 %)
Gender
Male	80 (43.0 %)	28 (41.2 %)	52 (44.1 %)	0.701
Female	106 (57.0 %)	40 (58.8 %)	66 (55.9 %)
HBsAg
Negative	141 (75.8 %)	64 (94.1 %)	77 (65.3 %)	< 0.001*
Positive	45 (24.2 %)	4 (5.9 %)	41 (34.7 %)
Liver cirrhosis
No	147 (79.0 %)	59 (86.8 %)	88 (74.6 %)	0.049*
Yes	39 (21.0 %)	9 (13.2 %)	30 (25.4 %)
Tumor number
Single	141 (75.8 %)	53 (77.9 %)	88 (74.6 %)	0.606
Muitiple	45 (24.2 %)	15 (22.1 %)	30 (25.4 %)
Tumor size
≤ 5	94 (50.5 %)	41 (60.3 %)	53 (44.9 %)	0.043*
> 5	92 (49.5 %)	27 (39.7 %)	65 (55.1 %)
CA19-9a
≤ 37	74 (41.8 %)	10 (15.9 %)	64 (56.1 %)	< 0.001*
> 37	103 (58.2 %)	53 (84.1 %)	50 (43.9 %)
CEAa
≤ 5	119 (66.9 %)	26 (41.3 %)	93 (80.9 %)	< 0.001*
> 5	59 (33.1 %)	37 (58.7 %)	22 (19.1 %)
Lymph node metastasis
No	156 (83.9 %)	51 (75.0 %)	105 (89.0 %)	0.013*
Yes	30 (16.1 %)	17 (25.0 %)	13 (11.0 %)
TNM stage
I + II	155 (83.3 %)	51 (75.0%)	104 (87.3%)	0.021*
III + IV	31 (16.7 %)	17 (27.0%)	14 (12.7%)
*p < 0.05 indicates a significant association between the variables. The pearson Chi-square was used.
a: CA19-9 was missing in 9 patients, and CEA was missing in 8 patients.

## Sheet: 2.Survial analysis
Variables	Univariable analysis	Multivariable analysis
	P	Hazard ratio (95% CI)	P
Age: > 51 vs. ≤ 51	NS		NA
Gender: male v female	NS		NA
CA19-9: > 37 vs. ≤ 37	0.039*		NS
CEA: > 5 vs. ≤ 5	NS		NA
Tumor size: > 5 vs. ≤ 5	< 0.001*	2.089 (1.349-3.236)	0.001*
Tumor number: multiple vs. single	0.002*	1.781 (1.137-2.790)	0.012*
Liver cirrhosis: yes vs. no	NS		NA
Lymph node metastasis: yes vs. no	0.003*		NS
TNM stage: III+IV v I+II	0.006*		NS
S100P/SPP1: S100P+SPP1- vs. S100P-SPP1+	0.008*	1.922 (1.257-2.939)	0.003*
Abbreviations: TNM, tumor–node–metastasis; CI, confidence interval; NA, not adopted; NS, not significant.
Univariate analysis was calculated by the Kaplan–Meier method (log-rank test).
Multivariate analysis was done using the Cox multivariate proportional hazard regression model with stepwise manner.
*p < 0.05 indicates a significant association between the variables.
