# Supplementary material for: Single-Cell Transcriptomic Analysis Reveals Two Molecularly and Clinically Distinct Subtypes of Intrahepatic Cholangiocarcinoma
Source: Research Square preprint supplement (doi:10.21203/rs.3.rs-641386/v1), 2021-06-25
Supplement: Supplementary file 9 [file 26332174c3cfee91914a1e71.xlsx]

## Sheet: Description
Supplementary Data 4. Classification of patients in two public datasets based on the expression of S100P and SPP1.
1. Classification of patients in Jusakul et al.’s dataset based on the expression of S100P and SPP1.
2. Classification of patients in Sia et al.’s dataset based on the expression of S100P and SPP1.

## Sheet: 1.Jusakul et al.’s dataset
Sample	S100P	SPP1	S100P_Class	SPP1_Class	Group	Sex	Age (year)	Subtype	TNM	Stage	Survival (days)	HBV	HCV
200643150050_A	-0.799474	2.05472	Negative	Positive	S100P-SPP1+	F	49	Intrahepatic	T1NxM0	N/A	2044	Negative	Negative
200643150050_B	-0.791513	2.31272	Negative	Positive	S100P-SPP1+	M	56	Intrahepatic	T4N0M0	IVA	1531	Negative	Negative
200643150050_C	-0.803085	0.412467	Negative	Positive	S100P-SPP1+	F	78	Intrahepatic	T3NxM0	N/A	19	Negative	Negative
200643150050_D	-0.196362	1.19055	Positive	Positive	Others	F	52	Intrahepatic	T3NxM0	N/A	219	Negative	Positive
200643150050_E	-0.801641	0.905853	Negative	Positive	S100P-SPP1+	M	70	Intrahepatic	T2bN0	N/A	777	Negative	Negative
200643150050_F	1.85486	-0.802483	Positive	Negative	S100P+SPP1-	M	40	Intrahepatic	T3N2M0	IVA	210	N/A	N/A
200643150050_G	0.986881	-0.772115	Positive	Negative	S100P+SPP1-	M	70	Extrahepatic	T3N0M0	IIA	1500	Negative	Negative
200643150050_H	-0.671725	0.397875	Negative	Positive	S100P-SPP1+	F	44	Intrahepatic	T2bN1M0	IVA	575	Negative	Negative
200643150050_I	1.96747	-0.612807	Positive	Negative	S100P+SPP1-	M	69	Extrahepatic	T3N1M0	IIB	419	Negative	Negative
200643150050_J	-0.0902247	-0.419529	Positive	Negative	S100P+SPP1-	M	62	Intrahepatic	T2bNxM0	N/A	472	Negative	Negative
200643150050_K	-0.211811	-0.720689	Positive	Negative	S100P+SPP1-	M	58	Extrahepatic	T1N1M0	IIB	735	Negative	Negative
200643150050_L	-0.431927	-0.830927	Positive	Negative	S100P+SPP1-	M	72	Extrahepatic	T2N0M0	II	1210	Negative	Negative
200643150051_A	0.238662	-0.758664	Positive	Negative	S100P+SPP1-	M	52	Intrahepatic	T3N0M0	III	1037	N/A	N/A
200643150051_B	-0.763179	-0.326112	Negative	Negative	Others	M	73	Intrahepatic	T2aN0M0	II	542	N/A	N/A
200643150051_C	-0.263531	0.494617	Positive	Positive	Others	M	64	Intrahepatic	T3N1M0	IVA	505	N/A	N/A
200643150051_D	-0.316554	-0.76879	Positive	Negative	S100P+SPP1-	M	49	Extrahepatic	T4N0M1	IVB	577	N/A	N/A
200643150051_E	1.03735	-0.527767	Positive	Negative	S100P+SPP1-	F	52	Intrahepatic	T2aN0M0	II	916	N/A	N/A
200643150051_F	0.0150156	-0.433614	Positive	Negative	S100P+SPP1-	M	64	Intrahepatic	T3N0M0	III	457	N/A	N/A
200643150051_G	0.956926	-0.473046	Positive	Negative	S100P+SPP1-	F	66	Intrahepatic	T3N1M0	IVA	109	N/A	N/A
200643150051_H	0.0242688	-0.708294	Positive	Negative	S100P+SPP1-	F	49	Extrahepatic	T2bN1M0	IIIB	251	N/A	N/A
200643150051_I	1.03735	1.8307	Positive	Positive	Others	M	70	Intrahepatic	T4NXM0	IVA	210	Negative	Negative
200643150051_J	3.29435	-0.876257	Positive	Negative	S100P+SPP1-	M	50	Intrahepatic	T3N1M0	IVA	180	Negative	Negative
200643150051_K	0.798251	-0.181098	Positive	Negative	S100P+SPP1-	F	51	Extrahepatic	T4N0M0	IVA	609	Negative	Negative
200643150051_L	1.95669	-0.794443	Positive	Negative	S100P+SPP1-	M	55	Extrahepatic	T4N0M0	IVA	340	Negative	Negative
200643150072_A	-0.27422	-0.821235	Positive	Negative	S100P+SPP1-	F	38	Intrahepatic	T2bN1M0	IVA	559	N/A	N/A
200643150072_B	0.763979	-0.822419	Positive	Negative	S100P+SPP1-	M	64	Extrahepatic	T3N0M1	IVB	256	N/A	N/A
200643150072_D	0.420758	-0.758662	Positive	Negative	S100P+SPP1-	M	66	Extrahepatic	TisN0m0	0	1714	N/A	N/A
200643150072_E	0.345323	-0.891983	Positive	Negative	S100P+SPP1-	M	60	Extrahepatic	T3N0M0	IIIA	1681	N/A	N/A
200643150072_F	0.439608	-0.299051	Positive	Negative	S100P+SPP1-	M	73	Intrahepatic	T3N0M0	III	82	Negative	Negative
200643150072_G	0.845139	-0.635607	Positive	Negative	S100P+SPP1-	M	56	Intrahepatic	T2bN0M0	II	785	Negative	Negative
200643150072_H	0.365795	-0.779104	Positive	Negative	S100P+SPP1-	M	47	Intrahepatic	T3N0M0	III	384	N/A	N/A
200643150072_I	-0.304875	-0.33527	Positive	Negative	S100P+SPP1-	M	42	Intrahepatic	T3N1M0	IVA	278	N/A	N/A
200643150072_J	-0.79851	1.97418	Negative	Positive	S100P-SPP1+	F	48	Intrahepatic	T2bN0M0	II	1111	N/A	N/A
200643150072_K	-0.778238	-0.439367	Negative	Negative	Others	F	49	Intrahepatic	T3N1M0	IVA	115	N/A	N/A
200643150072_L	0.000506227	-0.893814	Positive	Negative	S100P+SPP1-	M	66	Extrahepatic	T2aN0M0	II	1091	N/A	N/A
200647550008_A	0.600083	1.57544	Positive	Positive	Others	M	69	Intrahepatic	NA	NA	276	N/A	N/A
200647550008_B	-0.773209	-0.398171	Negative	Negative	Others	M	78	Intrahepatic	T3NXM0	N/A	362	Negative	Positive
200647550008_C	-0.0719477	-0.80364	Positive	Negative	S100P+SPP1-	F	53	Extrahepatic	T4N1M0	III	301	Negative	Negative
200647550008_D	-0.674302	-0.222924	Negative	Negative	Others	F	66	Intrahepatic	T1NXM0	N/A	539	Negative	Negative
200647550008_E	-0.792467	-0.779571	Negative	Negative	Others	F	61	Extrahepatic	T3N0M0	IIIA	1722	Negative	Negative
200647550008_F	-0.801684	0.405659	Negative	Positive	S100P-SPP1+	F	61	Intrahepatic	T3N0M0	III	848	Negative	Negative
200647550008_G	1.83819	0.25449	Positive	Positive	Others	F	77	Extrahepatic	TxN1Mx	N/A	74	N/A	N/A
200647550008_H	-0.797293	0.761526	Negative	Positive	S100P-SPP1+	F	55	Intrahepatic	T4N0M0	IVA	1262	Positive	Positive
200647550008_I	-0.794866	1.10391	Negative	Positive	S100P-SPP1+	F	26	Intrahepatic	T2bN0M0	II	348	Negative	Negative
200647550008_J	-0.794697	-0.51885	Negative	Negative	Others	F	60	Intrahepatic	T3N1M1	IVB	232	N/A	N/A
200647550008_K	2.12294	-0.540524	Positive	Negative	S100P+SPP1-	M	68	Extrahepatic	T1N0M0	I	898	Negative	Negative
200647550008_L	-0.802372	-0.510689	Negative	Negative	Others	M	32	Intrahepatic	T2bN1M1	IVB	341	Negative	Negative
200647720045_A	-0.800993	2.24524	Negative	Positive	S100P-SPP1+	M	53	Intrahepatic	T3NxMx	N/A	26	Negative	Negative
200647720045_B	-0.424336	-0.540743	Positive	Negative	S100P+SPP1-	F	49	Intrahepatic	T3N0M1	IVB	566	Negative	Negative
200647720045_C	-0.791994	0.239684	Negative	Positive	S100P-SPP1+	M	51	Intrahepatic	T3NxM0	N/A	1401	Negative	Negative
200647720045_D	-0.332017	-0.0482099	Positive	Positive	Others	F	43	Intrahepatic	T4NxM0	IVA	267	Negative	Negative
200647720045_E	-0.803296	2.22755	Negative	Positive	S100P-SPP1+	M	45	Intrahepatic	T2N0M0	II	3114	Negative	Negative
200647720045_F	-0.370252	0.293675	Positive	Positive	Others	M	29	Intrahepatic	T3N1M0	IVA	3217	Negative	Negative
200647720045_G	-0.803228	0.586526	Negative	Positive	S100P-SPP1+	M	62	Intrahepatic	T4NxM0	IVA	1689	Negative	Negative
200647720045_H	0.888927	-0.417756	Positive	Negative	S100P+SPP1-	F	60	Intrahepatic	T3NxM0	N/A	280	Negative	Negative
200647720045_I	-0.802313	1.06051	Negative	Positive	S100P-SPP1+	M	75	Intrahepatic	T3N1M0	IVA	158	Negative	Negative
200647720045_J	-0.801795	0.16492	Negative	Positive	S100P-SPP1+	F	73	Intrahepatic	T3NxM0	N/A	2225	Negative	Negative
200647720045_K	-0.799596	1.91097	Negative	Positive	S100P-SPP1+	F	77	Intrahepatic	T3N1M0	IVA	248	Negative	Negative
200647720045_L	-0.782752	0.493372	Negative	Positive	S100P-SPP1+	M	78	Intrahepatic	T3NxM0	N/A	328	Negative	Negative
200739030011_A	-0.728391	1.91828	Negative	Positive	S100P-SPP1+	F	39	Intrahepatic	T1N0M0	I	406	Negative	N/A
200739030011_B	-0.801521	-0.417081	Negative	Negative	Others	M	49	Extrahepatic	T2bN0M0	II	1989	N/A	Negative
200739030011_C	0.365795	-0.677793	Positive	Negative	S100P+SPP1-	F	45	Extrahepatic	T4N1M0	IVA	528	Negative	Negative
200739030011_D	-0.800754	1.1385	Negative	Positive	S100P-SPP1+	F	74	Intrahepatic	T1N0M0	I	1129	Negative	Negative
200739030011_E	-0.799914	0.0240495	Negative	Positive	S100P-SPP1+	M	35	Extrahepatic	T3N0M0	III	624	N/A	N/A
200739030011_F	-0.794779	-0.101855	Negative	Positive	S100P-SPP1+	M	63	Intrahepatic	T2aN0M0	II	415	Negative	Negative
200739030011_G	1.64362	-0.895793	Positive	Negative	S100P+SPP1-	F	56	Extrahepatic	T1N0M0	I	1760	N/A	N/A
200739030011_H	-0.798018	2.18343	Negative	Positive	S100P-SPP1+	F	72	Intrahepatic	T3N1M0	IVA	1119	Negative	Negative
200739030011_I	0.00836033	-0.893699	Positive	Negative	S100P+SPP1-	F	52	Intrahepatic	T3N1M0	IVA	945	Negative	Negative
200739030011_J	1.03069	-0.637112	Positive	Negative	S100P+SPP1-	M	55	Intrahepatic	T4N0M0	IVA	154	Negative	Negative
200739030011_K	2.51112	-0.724827	Positive	Negative	S100P+SPP1-	M	50	Extrahepatic	T2bN1M0	IIIB	377	N/A	N/A
200739030011_L	0.213965	-0.496056	Positive	Negative	S100P+SPP1-	M	76	Extrahepatic	T4N1M1	IVB	3	N/A	N/A
3998386005_A	-0.95854	0.725484	Negative	Positive	S100P-SPP1+	M	56	Intrahepatic	T1N0M0	I	381	Negative	Negative
3998386005_B	-0.07314	-0.712528	Positive	Negative	S100P+SPP1-	M	48	Intrahepatic	T3N0M0	III	373	Negative	Negative
3998386005_C	0.530701	-0.862735	Positive	Negative	S100P+SPP1-	M	66	Intrahepatic	T3N0M0	III	64	Negative	Negative
3998386005_D	0.273035	-0.437695	Positive	Negative	S100P+SPP1-	M	56	Intrahepatic	T4N1M0	IVA	157	N/A	N/A
3998386005_E	0.292929	-0.932186	Positive	Negative	S100P+SPP1-	F	65	Intrahepatic	T3N0M0	III	177	N/A	N/A
3998386005_F	0.89054	0.299492	Positive	Positive	Others	F	49	Intrahepatic	T3N0M0	III	167	Positive	Negative
3998386005_G	1.44707	-0.570517	Positive	Negative	S100P+SPP1-	M	46	Extrahepatic	T3N0M0	IIIA	625	N/A	N/A
3998386005_H	-0.603995	-1.01577	Positive	Negative	S100P+SPP1-	F	76	Extrahepatic	T3N0M0	IIIA	440	N/A	N/A
3998386005_I	0.0320067	-0.789318	Positive	Negative	S100P+SPP1-	M	53	Extrahepatic	T3N1M1	IVB	30	N/A	N/A
3998386005_J	-0.663997	-0.971111	Negative	Negative	Others	M	60	Extrahepatic	T4N0M0	IVA	360	N/A	N/A
3998386005_K	0.937276	-0.848442	Positive	Negative	S100P+SPP1-	F	51	Intrahepatic	T3N1M0	IVA	154	Negative	Negative
3998386005_L	-0.13106	0.278319	Positive	Positive	Others	M	61	Extrahepatic	T3N0M0	IIIB	456	Negative	Negative
3998386019_A	1.40905	-0.522046	Positive	Negative	S100P+SPP1-	F	53	Intrahepatic	T3N0M0	III	266	Negative	Negative
3998386019_B	0.174324	-0.761268	Positive	Negative	S100P+SPP1-	F	69	Intrahepatic	T3N1M0	IVA	1168	N/A	N/A
3998386019_C	0.100227	-0.443526	Positive	Negative	S100P+SPP1-	F	79	Intrahepatic	T4N0M0	IVA	228	N/A	N/A
3998386019_D	-0.846414	-0.899875	Negative	Negative	Others	M	52	Extrahepatic	T2aN1M0	IIIB	307	N/A	N/A
3998386019_E	-0.077301	-1.06018	Positive	Negative	S100P+SPP1-	M	57	Extrahepatic	T3N0M0	IIIA	1027	N/A	N/A
3998386019_F	-0.332502	-0.626903	Positive	Negative	S100P+SPP1-	M	37	Extrahepatic	T4N1M0	IIIA	475	Negative	Negative
3998386019_G	-0.187046	-0.798807	Positive	Negative	S100P+SPP1-	F	61	Intrahepatic	T3N0M0	III	149	Positive	Negative
3998386019_H	0.109131	-0.952712	Positive	Negative	S100P+SPP1-	M	63	Intrahepatic	T4N1M0	IVA	557	N/A	N/A
3998386019_I	1.73724	-1.00316	Positive	Negative	S100P+SPP1-	F	40	Intrahepatic	T1N0M0	I	2255	Negative	Negative
3998386019_J	1.71229	-0.856618	Positive	Negative	S100P+SPP1-	F	56	Intrahepatic	T2N0M0	II	2099	Negative	Negative
3998386024_A	-0.948374	1.32166	Negative	Positive	S100P-SPP1+	M	57	Intrahepatic	T1N0M0	I	2150	Positive	Negative
3998386024_B	-0.955434	1.03543	Negative	Positive	S100P-SPP1+	F	60	Intrahepatic	T1N0M1	IVB	91	Negative	Negative
3998386024_C	-0.941349	1.29197	Negative	Positive	S100P-SPP1+	M	74	Intrahepatic	T1N0M0	I	841	Negative	Negative
3998386024_D	-0.946238	1.49608	Negative	Positive	S100P-SPP1+	F	69	Intrahepatic	T2aN1M0	IVA	517	Negative	Negative
3998386024_E	-0.957779	2.12835	Negative	Positive	S100P-SPP1+	F	61	Intrahepatic	T1N0M0	I	1540	Positive	Negative
3998386024_F	0.337773	-1.03576	Positive	Negative	S100P+SPP1-	M	60	Intrahepatic	T1N0M0	I	982	N/A	N/A
3998386024_G	2.46202	-0.368463	Positive	Negative	S100P+SPP1-	F	61	Intrahepatic	N/A	N/A	1114	Negative	Negative
3998386024_H	-0.951729	1.09434	Negative	Positive	S100P-SPP1+	M	53	Intrahepatic	T3N0M0	III	990	No record	No record
3998386024_I	-0.953036	2.27832	Negative	Positive	S100P-SPP1+	M	55	Intrahepatic	T3N0M0	III	867	Positive	Negative
3998386024_J	-0.954924	0.194383	Negative	Positive	S100P-SPP1+	F	77	Intrahepatic	T2bN1M0	IVA	540	N/A	N/A
3998386024_K	0.0533855	-1.01468	Positive	Negative	S100P+SPP1-	F	71	Extrahepatic	T3N0M0	IIA	129	Negative	Negative
3998386024_L	-0.950574	1.55815	Negative	Positive	S100P-SPP1+	M	75	Intrahepatic	T1aN0M0	II	554	Negative	Negative
3998386026_A	2.92481	-1.00769	Positive	Negative	S100P+SPP1-	F	49	Extrahepatic	T2N0M1	IV	603	Negative	Negative
3998386026_B	-0.89971	-0.567397	Negative	Negative	Others	M	46	Extrahepatic	T3N1M0	IIB	93	Negative	Negative
3998386026_D	-0.949378	1.81127	Negative	Positive	S100P-SPP1+	F	69	Intrahepatic	N/A	N/A	9	Negative	Negative
3998386026_F	-0.486074	-1.05009	Positive	Negative	S100P+SPP1-	M	68	Extrahepatic	T1N1M0	IA	2304	Negative	Negative
3998386026_G	-0.389119	-0.189803	Positive	Negative	S100P+SPP1-	F	73	Intrahepatic	T3N0M0	III	232	Positive	Negative
3998386026_H	-0.956494	1.35372	Negative	Positive	S100P-SPP1+	F	67	Intrahepatic	T1N1M0	IVA	1154	Positive	Negative
3998386026_I	-0.958131	1.71489	Negative	Positive	S100P-SPP1+	F	51	Intrahepatic	T1N0M0	I	858	Negative	Negative
3998386026_J	-0.959116	-0.576257	Negative	Negative	Others	M	61	Intrahepatic	T1N0M0	I	2848	Positive	Negative
3998386026_K	-0.381016	-0.242355	Positive	Negative	S100P+SPP1-	F	78	Intrahepatic	T1N1M0	IVA	523	Negative	Negative
3998386026_L	-0.950243	-0.975154	Negative	Negative	Others	M	51	Intrahepatic	T1N0M0	I	1381	Negative	Negative

## Sheet: 2.Sia et al.’s dataset
S100P	SPP1	S100P_Class	SPP1_Class	Group	Sample
-0.674809	1.01531	Negative	Positive	S100P-SPP1+	ICC018G
0.186334	0.363962	Positive	Negative	S100P+SPP1-	ICC014G
-0.638418	0.349253	Negative	Negative	Others	ICC013G
-0.493743	0.829614	Negative	Positive	S100P-SPP1+	ICC009G
-0.601676	0.906293	Negative	Positive	S100P-SPP1+	ICC008G
-0.965	0.863938	Negative	Positive	S100P-SPP1+	ICC006G
2.04792	0.0684183	Positive	Negative	S100P+SPP1-	ICC003G
-0.751878	0.643826	Negative	Positive	S100P-SPP1+	ICC001G
-0.364216	0.89912	Negative	Positive	S100P-SPP1+	ICC120G
1.29285	0.666016	Positive	Positive	Others	ICC086G
-0.789041	0.712078	Negative	Positive	S100P-SPP1+	ICC116G
-0.953039	0.856121	Negative	Positive	S100P-SPP1+	ICC112G
0.347282	0.829117	Positive	Positive	Others	ICC111G
-0.663986	0.826737	Negative	Positive	S100P-SPP1+	ICC110G
-0.261209	0.30367	Negative	Negative	Others	ICC107G
-0.807888	-0.398269	Negative	Negative	Others	ICC104G
-0.558528	0.838926	Negative	Positive	S100P-SPP1+	ICC079G
-0.730704	0.529675	Negative	Positive	S100P-SPP1+	ICC044G
-0.888171	0.870721	Negative	Positive	S100P-SPP1+	ICC099G
-0.736024	0.171482	Negative	Negative	Others	ICC098G
-0.664399	0.752735	Negative	Positive	S100P-SPP1+	ICC097G
-0.15836	0.191503	Negative	Negative	Others	ICC027G
2.05771	0.0630495	Positive	Negative	S100P+SPP1-	ICC023G
-0.930446	0.334253	Negative	Negative	Others	ICC011G
1.08983	0.78243	Positive	Positive	Others	ICC005G
1.76839	-0.198707	Positive	Negative	S100P+SPP1-	ICC002G
-0.719936	-1.62092	Negative	Negative	Others	ICC119G
-0.480194	0.621935	Negative	Positive	S100P-SPP1+	ICC096G
-0.117094	0.651411	Negative	Positive	S100P-SPP1+	ICC092G
-0.666935	0.957449	Negative	Positive	S100P-SPP1+	ICC091G
2.64933	-0.429186	Positive	Negative	S100P+SPP1-	ICC090G
-0.739942	0.882104	Negative	Positive	S100P-SPP1+	ICC087G
-0.326258	0.602459	Negative	Positive	S100P-SPP1+	ICC082G
2.56233	0.20901	Positive	Negative	S100P+SPP1-	ICC081G
-0.833821	0.783569	Negative	Positive	S100P-SPP1+	ICC118G
1.42931	0.793091	Positive	Positive	Others	ICC113G
-0.559655	-2.0649	Negative	Negative	Others	ICC106G
1.13675	0.448178	Positive	Negative	S100P+SPP1-	ICC095G
2.37678	0.81975	Positive	Positive	Others	ICC094G
0.454011	0.939426	Positive	Positive	Others	ICC077G
-0.795508	0.852043	Negative	Positive	S100P-SPP1+	ICC074G
2.54119	0.878504	Positive	Positive	Others	ICC072G
1.69481	-0.220284	Positive	Negative	S100P+SPP1-	ICC071G
-0.166164	0.906173	Negative	Positive	S100P-SPP1+	ICC093G
-0.699378	0.910354	Negative	Positive	S100P-SPP1+	ICC068G
-0.516614	0.167251	Negative	Negative	Others	ICC067G
-0.669127	0.309288	Negative	Negative	Others	ICC065G
2.64056	0.536124	Positive	Positive	Others	ICC064G
1.51306	0.821783	Positive	Positive	Others	ICC061G
-0.557758	0.910819	Negative	Positive	S100P-SPP1+	ICC075G
-0.827396	0.785222	Negative	Positive	S100P-SPP1+	ICC073G
-0.896747	0.871514	Negative	Positive	S100P-SPP1+	ICC063G
-0.498438	0.80185	Negative	Positive	S100P-SPP1+	ICC055G
-0.805966	-0.00308426	Negative	Negative	Others	ICC053G
-0.399396	1.02576	Negative	Positive	S100P-SPP1+	ICC052G
-0.68707	1.02827	Negative	Positive	S100P-SPP1+	ICC059G
-0.383119	0.952291	Negative	Positive	S100P-SPP1+	ICC058G
-0.22267	-0.14833	Negative	Negative	Others	ICC057G
1.16346	0.931902	Positive	Positive	Others	ICC056G
-0.415406	0.750843	Negative	Positive	S100P-SPP1+	ICC049G
-0.44892	0.641836	Negative	Positive	S100P-SPP1+	ICC041G
-0.440449	0.903216	Negative	Positive	S100P-SPP1+	ICC040G
-0.893416	0.857113	Negative	Positive	S100P-SPP1+	ICC039G
1.74945	-0.897247	Positive	Negative	S100P+SPP1-	ICC037G
-0.291535	0.733189	Negative	Positive	S100P-SPP1+	ICC034G
-0.762548	0.774553	Negative	Positive	S100P-SPP1+	ICC021G
-0.662819	0.750263	Negative	Positive	S100P-SPP1+	ICC020G
-0.698578	0.188798	Negative	Negative	Others	ICC051G
2.19362	0.795175	Positive	Positive	Others	ICC016G
0.392825	0.586826	Positive	Positive	Others	ICC015G
2.39443	0.0342087	Positive	Negative	S100P+SPP1-	ICC012G
-0.615008	0.912503	Negative	Positive	S100P-SPP1+	ICC028G
-0.657273	0.484211	Negative	Negative	Others	ICC022G
1.0262	0.770074	Positive	Positive	Others	ICC047G
-0.871384	0.712246	Negative	Positive	S100P-SPP1+	ICC046G
1.4745	0.582099	Positive	Positive	Others	ICC031G
-0.26355	1.01804	Negative	Positive	S100P-SPP1+	ICC024G
1.93724	0.61158	Positive	Positive	Others	ICC019G
-0.709226	-1.50498	Negative	Negative	Others	ICC018NT
-0.385796	-1.69638	Negative	Negative	Others	ICC014NT
0.301797	-1.5246	Positive	Negative	S100P+SPP1-	ICC013NT
0.19985	-0.959343	Positive	Negative	S100P+SPP1-	ICC008NT
-0.26325	-2.12	Negative	Negative	Others	ICC001NT
-0.370929	-1.32246	Negative	Negative	Others	ICC120NT
-0.299087	-1.63475	Negative	Negative	Others	ICC079NT
0.170147	-0.919079	Positive	Negative	S100P+SPP1-	ICC044NT
-0.154105	-1.28113	Negative	Negative	Others	ICC099NT
-0.654741	-1.22902	Negative	Negative	Others	ICC097NT
1.44272	-1.10423	Positive	Negative	S100P+SPP1-	ICC096NT
-0.537357	0.0568284	Negative	Negative	Others	ICC119NT
-0.383449	-1.35077	Negative	Negative	Others	ICC118NT
-0.433464	-1.46545	Negative	Negative	Others	ICC094NT
-0.567031	-0.896802	Negative	Negative	Others	ICC077NT
-0.502085	-2.09779	Negative	Negative	Others	ICC071NT
0.0206554	-1.14782	Positive	Negative	S100P+SPP1-	ICC093NT
-0.368785	-1.65225	Negative	Negative	Others	ICC085NT
-0.245463	-1.6014	Negative	Negative	Others	ICC053NT
-0.342534	-1.68973	Negative	Negative	Others	ICC059NT
-0.617948	-0.708897	Negative	Negative	Others	ICC056NT
0.242661	-1.62221	Positive	Negative	S100P+SPP1-	ICC041NT
-0.647912	-0.699747	Negative	Negative	Others	ICC039NT
-0.328936	-0.356653	Negative	Negative	Others	ICC021NT
-0.839603	-1.18646	Negative	Negative	Others	ICC054NT
-0.55539	-1.76566	Negative	Negative	Others	ICC050NT
0.0586068	-1.52344	Positive	Negative	S100P+SPP1-	ICC047NT
-0.310338	-0.905823	Negative	Negative	Others	ICC028NT
-0.302494	-1.40771	Negative	Negative	Others	ICC026NT
-0.676966	-1.93261	Negative	Negative	Others	ICC022NT
0.161869	-1.42076	Positive	Negative	S100P+SPP1-	ICC027NT
